# Supplementary material
Source: publisher figshare collection journal article supplement (https://aacr.figshare.com/articles/dataset/_/22388661)
Supplement: Supplementary file 1 [file 39834150]

Supplementary data S1.

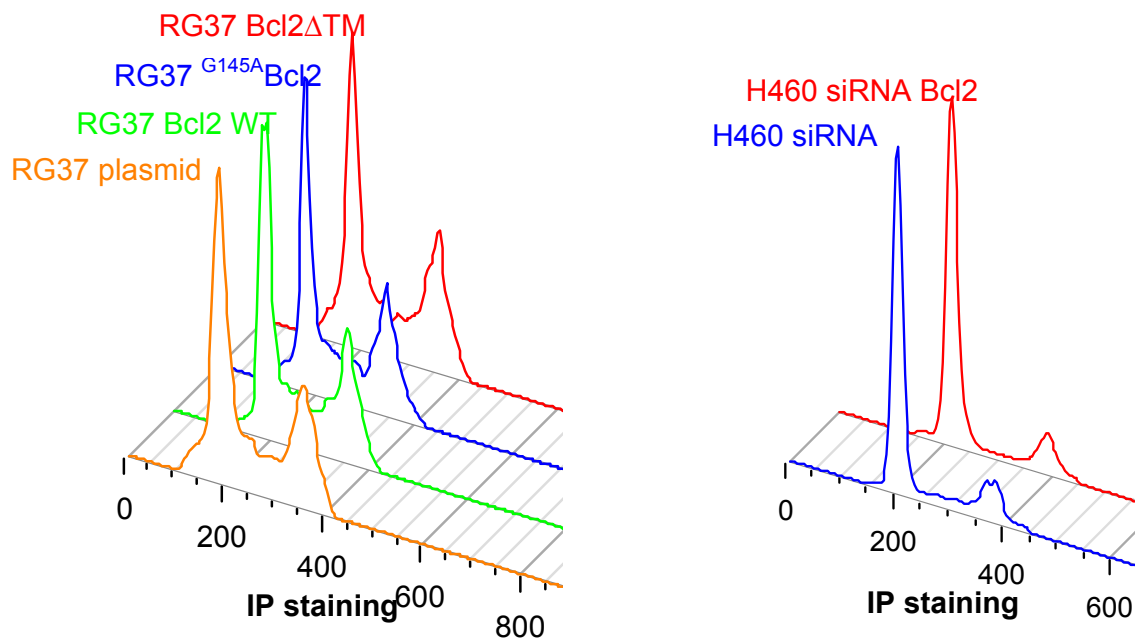

Cell cycle distribution after overexpression of different forms of Bcl-2 in RG37 cells (left panel) or silencing of endogenous Bcl-2 in H460 cells (right panel).
